# Supplementary material for: Smoking and Incidence of Insomnia: a systematic review and meta-analysis of cohort studies
Source: Research Square preprint supplement (doi:10.21203/rs.3.rs-27889/v4), 2020-10-07
Supplement: Supplementary file 1 [file f55691fef6b9a8364f5fb259.docx]

**Supplements**

The full electronic search strategy for PubMed is: (((((((((((Insomnia[MeSH Terms]) OR Insomnia Disorder[Title/Abstract]) OR Insomnia Disorders[Title/Abstract]) OR Sleep Disorder[Title/Abstract]) OR Sleep Disorders[Title/Abstract]) OR Sleep Disturbance[Title/Abstract]) OR Night Terroris[Title/Abstract]) OR Sleeplessness[Title/ Abstract]) OR Insomnia Disorders[Title/Abstract]) OR Insomnia Disorder[Title/Abstract]) OR Sleep Health[Title/Abstract]) AND ((((((((((Smoking[MeSH Terms]) OR Smoke[Title/Abstract]) OR Smokeable[Title/Abstract]) OR Smokes[Title/Abstract]) OR Tobacco Smoking[Title/Abstract]) OR Smk[Title/Abstract]) OR Cigarette [MeSH Terms]) OR Cigarette Smoking[Title/Abstract]) OR Cigar[Title/Abstract]) OR Cigars[Title/ Abstract]).

The search strategies for EMBASE is as follows: ('Insomnia':ab,ti OR 'Insomnias':ab,ti OR 'Insomnia Disorders':ab,ti OR 'Insomnia Disorder':ab,ti OR 'Disturbance Sleep':ab,ti OR 'Night Terroris':ab,ti OR 'Sleep Disorder':ab,ti OR 'Sleep Disorders':ab,ti OR 'Sleeplessness':ab,ti OR 'Disorder Sleep':ab,ti OR 'Sleep Disturbance':ab,ti OR 'Sleep Health':ab,ti) AND ('Smoke':ab,ti OR 'Smoking':ab,ti OR 'Smokeable':ab,ti OR 'Smokes':ab,ti OR 'Tobacco Smoking':ab,ti OR 'Smk':ab,ti OR 'Cigarette':ab,ti OR 'Cigarette Smoking':ab,ti OR 'Cigar':ab,ti OR 'Cigars':ab,ti). The search strategies for OVID is (“smoking” OR “smoking”) AND (“insomnia” OR “insomnia disorders” OR “disorder insomnia” OR “sleep disorder”) {Including Limited Related Terms}. We have added the information in supplements.
